# Supplementary material for: Achiral flexible liquid crystal trimers exhibiting chiral conglomerates
Source: Royal Society of Chemistry journal article supplement (doi:10.1039/c5sm02969d), 2016-01-01
Supplement: c5sm02969d1.pdf [file c5sm02969d1.pdf]

## Electronic supporting information

### Achiral Flexible Liquid Crystal Trimers Exhibiting Chiral Conglomerate Phases

Haruna Sasaki,<sup>a</sup> Yoichi Takanishi,<sup>b</sup> Jun Yamamoto<sup>b</sup> and Atsushi Yoshizawa\*,<sup>a</sup>

*<sup>a</sup>Department of Frontier Materials Chemistry, Graduate School of Science and Technology, Hirosaki University, 3 Bunkyo-cho, Hirosaki, 036-8561, Japan*

*E-mail: ayoshiza@hirosaki-u.ac.jp*

*<sup>b</sup>Department of Physics, Graduate School of Science, Kyoto University, Oiwake-cho, Kitashirakawa, Sakyo-ku, Kyoto, 606-8562, Japan*

1. Characterization of trimers **I**–(5,5), **I**–(6,6), **I**–(7,5), **I**–(7,9), **I**–(9,9), **II**–(7,7), **III**–(7,7) and **IV**–(7,7).
2. Table S1 Phase transition temperatures (°C) and  $\Delta S/R$  for **I**–(n,m).
3. Fig. S1 Polarized optical textures of trimer **III**–(7,7) on a glass slide with a cover glass in the SmA, SmC, SmX and Y phases.
4. Fig. S2 DSC thermogram of trimer **III**–(7,7). The rate of cooling and heating was 5 °C min<sup>-1</sup>.

Characterization of trimers **I**–(5,5), **I**–(6,6), **I**–(7,5), **I**–(7,9), **I**–(9,9), **II**–(7,7), **III**–(7,7) and **IV**–(7,7).

**2-{4-[5-(4-(4-Octyloxyphenyl)phenoxy)pentyl]oxy}phenyl}-5-{5-[4-(5-octyloxy pyrimidin-2-yl)phenoxy]pentyl}pyrimidine (**I**–(5,5)).**

<sup>1</sup>HNMR (500 MHz, CDCl<sub>3</sub>, TMS): δ=8.40 (s, 2H, Ar-H), 8.41 (s, 2H, Ar-H), 8.26 (d, 4H, Ar-H, *J* = 8.0 Hz), 7.45 (d, 2H, Ar-H, *J* = 9.2 Hz), 7.45 (d, 2H, Ar-H, *J* = 8.6 Hz), 6.97 (d, 4H, Ar-H, *J* = 9.2 Hz), 6.94 (d, 2H, Ar-H, *J* = 9.2 Hz), 6.92 (d, 2H, Ar-H, *J* = 9.2 Hz), 4.12 (t, 2H, -OCH<sub>2</sub>-, *J* = 6.3 Hz), 4.07 (t, 4H, -OCH<sub>2</sub>-, *J* = 6.3 Hz), 4.06 (t, 2H, -OCH<sub>2</sub>-, *J* = 6.3 Hz), 4.03 (t, 2H, -OCH<sub>2</sub>-, *J* = 6.9 Hz), 3.98 (t, 2H, -OCH<sub>2</sub>-, *J* = 6.9 Hz), 1.96–1.68 (m, 16H, aliphatic-H), 1.49–1.29 (m, 20H, aliphatic-H), 0.89 (t, 6H, -CH<sub>3</sub>, *J* = 6.9 Hz). IR (KBr):ν cm<sup>-1</sup>: 2925, 2868 (C-H str), 1608 (Ar-H str), 1256 (C-O str). Elemental Analysis Calcd. for C<sub>75.5</sub>; H, 8.08; N, 6.07. Found C, 75.5; H, 7.68; N, 6.06.

**2-{4-[6-(4-(4-Octyloxyphenyl)phenoxy)hexyl]oxy}phenyl}-5-{6-[4-(5-octyloxy pyrimidin-2-yl)phenoxy] hexyl}pyrimidine (**I**–(6, 6)).**

<sup>1</sup>HNMR (500 MHz, CDCl<sub>3</sub>, TMS): δ=8.40 (s, 4H, Ar-H), 8.27 (d, 4H, Ar-H, *J* = 8.6 Hz), 7.44 (d, 4H, Ar-H, *J* = 8.6 Hz), 6.96 (d, 4H, Ar-H, *J* = 9.2 Hz), 6.93 (d, 2H, Ar-H, *J* = 9.2 Hz), 4.10 (t, 2H, -OCH<sub>2</sub>-, *J* = 6.3 Hz), 4.08 (t, 2H, -OCH<sub>2</sub>-, *J* = 6.3 Hz), 4.05 (t, 4H, -OCH<sub>2</sub>-, *J* = 6.3 Hz), 4.01 (t, 2H, -OCH<sub>2</sub>-, *J* = 6.9 Hz), 3.98 (t, 2H, -OCH<sub>2</sub>-, *J* = 6.9 Hz), 1.86–1.78 (m, 12H, aliphatic-H), 1.59–1.30 (m, 28H, aliphatic-H), 0.89 (t, 6H, -CH<sub>3</sub>, *J* = 6.9 Hz). IR (KBr):ν cm<sup>-1</sup>: 2941, 2867 (C-H str), 1608 (Ar-H str), 1249 (C-O str). Elemental Analysis Calcd. for C<sub>75.8</sub>; H, 8.26; N, 5.89. Found C, 76.1; H, 7.93; N, 5.93.

**2-{4-[9-(4-(4-Octyloxyphenyl)phenoxy)nonyl]oxy}phenyl}-5-{9-[4-(5-octyloxy pyrimidin-2-yl)phenoxy]nonyl}pyrimidine (**I**–(9,9)).**

<sup>1</sup>HNMR (500 MHz, CDCl<sub>3</sub>, TMS): δ=8.40 (s, 4H, Ar-H), 8.26 (d, 4H, Ar-H, *J* = 8.6 Hz), 6.96 (d, 4H, Ar-H, *J* = 8.3 Hz), 6.93 (d, 4H, Ar-H, *J* = 8.0 Hz), 4.07 (t, 4H, -OCH<sub>2</sub>-, *J* = 6.3 Hz), 4.02 (t, 2H, -OCH<sub>2</sub>-, *J* = 6.3 Hz), 4.05 (t, 2H, -OCH<sub>2</sub>-, *J* = 6.3 Hz), 3.99 (t, 2H, -OCH<sub>2</sub>-, *J* = 6.9 Hz), 3.97 (t, 2H, -OCH<sub>2</sub>-, *J* = 6.9 Hz), 1.85–1.69 (m, 12H, aliphatic-H), 1.47–1.29 (m, 40H, aliphatic-H), 0.89 (t, 6H, -CH<sub>3</sub>, *J* = 6.9 Hz). IR

(KBr): $\nu$   $\text{cm}^{-1}$ : 2933, 2851 (C-H str), 1608 (Ar-H str), 1246 (C-O str). Elemental Analysis Calcd. for  $\text{C}_{76.6}$ ; H, 8.76; N, 5.43. Found C, 76.8; H, 8.40; N, 5.43.

**2-{4-[5-(4-(4-Octyloxyphenyl)phenoxy)pentyl]oxy}phenyl}-5-{7-[4-(5-octyloxy-pyrimidin-2-yl)phenoxy]heptyloxy}pyrimidine (I-(7,5)).**

$^1\text{H}$ NMR (500 MHz,  $\text{CDCl}_3$ , TMS):  $\delta$ =8.40 (s, 4H, Ar-H), 8.26 (d, 4H, Ar-H,  $J$  = 9.2 Hz), 7.45 (d, 4H, Ar-H,  $J$  = 8.6 Hz), 6.96 (d, 4H, Ar-H,  $J$  = 8.6 Hz), 6.93 (d, 4H, Ar-H,  $J$  = 9.2 Hz), 4.08 (t, 2H,  $-\text{OCH}_2-$ ,  $J$  = 6.3 Hz), 4.07 (t, 2H,  $-\text{OCH}_2-$ ,  $J$  = 6.3 Hz), 4.05 (t, 2H,  $-\text{OCH}_2-$ ,  $J$  = 6.3 Hz), 4.03 (t, 2H,  $-\text{OCH}_2-$ ,  $J$  = 6.9 Hz), 4.02 (t, 2H,  $-\text{OCH}_2-$ ,  $J$  = 6.3 Hz), 3.98 (t, 2H,  $-\text{OCH}_2-$ ,  $J$  = 6.9 Hz), 1.92–1.76 (m, 12H, aliphatic-H), 1.72–1.29 (m, 28H, aliphatic-H), 0.89 (t, 6H,  $-\text{CH}_3$ ,  $J$  = 6.9 Hz). IR (KBr): $\nu$   $\text{cm}^{-1}$ : 2936, 2867 (C-H str), 1608 (Ar-H str), 1252 (C-O str). Elemental Analysis Calcd. for  $\text{C}_{75.8}$ ; H, 8.26; N, 5.89. Found C, 76.1; H, 7.93; N, 5.93.

**2-{4-[9-(4-(4-Octyloxyphenyl)phenoxy)nonyloxy]phenyl}-5-{7-[4-(5-octyloxy-pyrimidin-2-yl)phenoxy]heptyloxy}pyrimidine (I-(7,9)).**

$^1\text{H}$ NMR (500 MHz,  $\text{CDCl}_3$ , TMS):  $\delta$ =8.40 (s, 4H, Ar-H), 8.26 (d, 4H, Ar-H,  $J$  = 9.2 Hz), 7.44 (d, 4H, Ar-H,  $J$  = 6.9 Hz), 6.96 (d, 4H, Ar-H,  $J$  = 9.2 Hz), 6.93 (d, 4H, Ar-H,  $J$  = 8.6 Hz), 4.08 (t, 2H,  $-\text{OCH}_2-$ ,  $J$  = 6.3 Hz), 4.07 (t, 2H,  $-\text{OCH}_2-$ ,  $J$  = 6.3 Hz), 4.03 (t, 2H,  $-\text{OCH}_2-$ ,  $J$  = 6.3 Hz), 4.01 (t, 2H,  $-\text{OCH}_2-$ ,  $J$  = 6.9 Hz), 3.98 (t, 4H,  $-\text{OCH}_2-$ ,  $J$  = 6.9 Hz), 1.86–1.76 (m, 12H, aliphatic-H), 1.53–1.29 (m, 36H, aliphatic-H), 0.89 (t, 6H,  $-\text{CH}_3$ ,  $J$  = 6.9 Hz). IR (KBr): $\nu$   $\text{cm}^{-1}$ : 2933, 2853 (C-H str), 1608 (Ar-H str), 1246 (C-O str). Elemental Anal Calcd. for  $\text{C}_{76.3}$ ; H, 8.60; N, 5.56. Found C, 76.6; H, 7.96; N, 5.60.

**2-{4-[7-(4-(5-Octyloxy-pyrimidin-2-yl)phenoxy)heptyloxy]phenyl}-5-{7-[4-(4-octyloxyphenyl)phenoxy]heptyloxy}pyrimidine (II-(7,7)).**

Potassium carbonate (1.5 mmol, 207 mg) was added to a solution of 1-(4-octyloxyphenyl)-4-(7-bromo-heptyloxy)benzene (1.5 mmol, 713 mg) and 2-(4'-hydroxyphenyl)-5-octyloxy-pyrimidine (2.0 mmol, 376 mg) in cyclohexanone (10 ml). The reaction mixture was stirred at 90 °C for 7 h. After filtration of the precipitate, the solvent was removed by evaporation. Then the residue was purified using column chromatography on silica gel with a toluene : ethyl acetate (5:1) mixture as the eluent.

The obtained white solid was recrystallized from ethanol to give 2-(4-hydroxyphenyl)-5-{7-[4-(4-octyloxyphen-1-yl)phenoxy]heptyloxy}pyrimidine. Yield 491 mg (56.2 %)

Potassium carbonate (0.3 mmol, 42 mg) was added to a solution of 2-(4-hydroxyphenyl)-5-{7-[4-(4-octyloxyphen-1-yl)phenoxy]heptyloxy}pyrimidine (0.3 mmol, 175 mg) and 5-octyloxy-2-(4-(7-bromo-heptyloxy)-phenyl)pyrimidine (0.3 mmol, 143 mg) in cyclohexanone (10 ml). The reaction mixture was stirred at 135 °C for 8 h. After filtration of the precipitate, the solvent was removed by evaporation. Then the residue was washed with hot ethanol and recrystallized from toluene to give the desired compound **II**. Yield 249 mg (84.9 %)

<sup>1</sup>HNMR (500 MHz, CDCl<sub>3</sub>, TMS): δ=8.40 (s, 4H, Ar-H), 8.26 (d, 4H, Ar-H, *J* = 8.6 Hz), 7.45 (d, 4H, Ar-H, *J* = 8.6 Hz), 7.44 (d, 4H, Ar-H, *J* = 9.2 Hz), 6.96 (d, 4H, Ar-H, *J* = 8.6 Hz), 6.93 (d, 4H, Ar-H, *J* = 8.6 Hz), 4.08 (t, 2H, -OCH<sub>2</sub>-, *J* = 6.3 Hz), 4.07 (t, 2H, -OCH<sub>2</sub>-, *J* = 6.3 Hz), 4.02 (t, 4H, -OCH<sub>2</sub>-, *J* = 6.3 Hz), 3.99 (t, 2H, -OCH<sub>2</sub>-, *J* = 6.3 Hz), 3.97 (t, 2H, -OCH<sub>2</sub>-, *J* = 6.3 Hz), 1.84–1.76 (m, 12H, aliphatic-H), 1.58–1.29 (m, 32H, aliphatic-H), 0.89 (t, 6H, -CH<sub>3</sub>, *J* = 6.9 Hz). IR (KBr):ν cm<sup>-1</sup>: 2933, 2854 (C-H str), 1608 (Ar-H str), 1247 (C-O str). Elemental Analysis Calcd. for C<sub>76</sub>H<sub>104</sub>N<sub>2</sub>O<sub>10</sub>: C, 76.0; H, 8.44; N, 5.72. Found C, 76.5; H, 8.19; N, 5.68.

**2-{4-[7-(4-(4-octyloxyphenyl)phenoxy)heptyloxy]phenyl}-5-{7-[2-(4-octyloxyphenyl)pyrimidin-5-yloxy]heptyloxy}pyrimidine (**III**-(7,7)).**

<sup>1</sup>HNMR (500 MHz, CDCl<sub>3</sub>, TMS): δ=8.41 (s, 4H, Ar-H), 8.25 (d, 4H, Ar-H, *J* = 8.0 Hz), 7.45 (d, 4H, Ar-H, *J* = 8.6 Hz), 6.96 (d, 4H, Ar-H, *J* = 8.0 Hz), 6.93 (d, 4H, Ar-H, *J* = 8.6 Hz), 4.09 (t, 4H, -OCH<sub>2</sub>-, *J* = 6.3 Hz), 4.02 (t, 2H, -OCH<sub>2</sub>-, *J* = 6.3 Hz), 4.01 (t, 2H, -OCH<sub>2</sub>-, *J* = 6.9 Hz), 3.99 (t, 2H, -OCH<sub>2</sub>-, *J* = 6.3 Hz), 3.98 (t, 2H, -OCH<sub>2</sub>-, *J* = 6.9 Hz), 1.87–1.77 (m, 12H, aliphatic-H), 1.56–1.29 (m, 32H, aliphatic-H), 0.89 (t, 6H, -CH<sub>3</sub>, *J* = 6.9 Hz). IR (KBr):ν cm<sup>-1</sup>: 2938, 2854 (C-H str), 1607 (Ar-H str), 1251 (C-O str). Elemental analysis Calcd for C<sub>76</sub>H<sub>104</sub>N<sub>2</sub>O<sub>10</sub>: C, 76.0; H, 8.44; N, 5.72. Found C, 77.0; H, 8.06; N, 5.71.

**2-{4-[7-(2-(4-Octyloxyphenyl)pyrimidin-5-yloxy)phenoxy]heptyloxy]phenyl}-5-{7-[4-(4-octyloxyphenyl)phenoxy]heptyloxy}pyrimidine (**IV**-(7,7)).**

<sup>1</sup>HNMR (500 MHz, CDCl<sub>3</sub>, TMS): δ=8.40 (s, 4H, Ar-H), 8.26 (d, 4H, Ar-H, *J* = 8.6 Hz), 7.45 (d, 2H, Ar-H, *J* = 8.6 Hz), 7.44 (d, 2H, Ar-H, *J* = 8.6 Hz), 6.96 (d, 2H, Ar-H,

$J = 8.6$  Hz), 6.96 (d, 2H, Ar-**H**,  $J = 8.6$  Hz), 6.93 (d, 4H, Ar-**H**,  $J = 8.6$  Hz), 4.08 (t, 4H, -O**CH**<sub>2</sub>-,  $J = 6.3$  Hz), 4.03 (t, 2H, -O**CH**<sub>2</sub>-,  $J = 6.3$  Hz), 4.00 (t, 2H, -O**CH**<sub>2</sub>-,  $J = 6.3$  Hz), 3.99 (t, 2H, -O**CH**<sub>2</sub>-,  $J = 6.3$  Hz), 3.98 (t, 2H, -O**CH**<sub>2</sub>-,  $J = 6.9$  Hz), 1.88–1.76 (m, 12H, aliphatic-**H**), 1.56–1.29 (m, 32H, aliphatic-**H**), 0.89 (t, 6H, -**CH**<sub>3</sub>,  $J = 6.9$  Hz). IR (KBr):  $\nu$  cm<sup>-1</sup>: 2935, 2865 (C-H str), 1608 (Ar-H str), 1248 (C-O str). Elemental analysis Calcd for C, 76.0; H, 8.44; N, 5.72. Found C, 77.2; H, 7.92; N, 5.70.

Table S1 Phase transition temperatures (°C) and  $\Delta S/R$  for **I-(n,m)**.

| <b>Compound</b> | <b>Heating</b>                                                               | <b>Cooling</b>                                                              |
|-----------------|------------------------------------------------------------------------------|-----------------------------------------------------------------------------|
| <b>I-(5,5)</b>  | Cry 168.9 (20.7) Iso                                                         | Iso 163.0 (20.4) Cry                                                        |
| <b>I-(6,6)</b>  | Cry 178.8 (9.5) SmC 208.1(7.1) Iso                                           | Iso 207.2 (7.5) SmC 174.3 (-) <sup>a</sup> Sm <sup>b</sup> 171.3 (11.3) Cry |
| <b>I-(7,5)</b>  | Cry 151.0 (19.1) N 157.9 (1.3) Iso                                           | Iso 156.8 (1.3) N 150.1 (0.6) SmC 145.7 (7.3) Cry                           |
| <b>I-(7,7)</b>  | Cry <sub>1</sub> 144.0 (5.5) Cry <sub>2</sub> 135.2 (8.8) N 156.9 (1.2) Iso  | Iso 155.8 (1.2) N 146.4 (10.4) DC                                           |
| <b>I-(7,9)</b>  | Cry <sub>1</sub> 130.1 (4.4) Cry <sub>2</sub> 138.9 (8.7) N 153.6 (1.3) Iso  | Iso 153.1 (1.3) N 137.8 (9.0) DC                                            |
| <b>I-(9,9)</b>  | Cry <sub>1</sub> 120.0 (7.7) Cry <sub>2</sub> 135.2 (12.7) N 150.4 (3.1) Iso | Iso 149.9 (2.9) N 134.1 (13.4) DC                                           |

<sup>a</sup>Entropy change too small to be detected.

<sup>b</sup>Unidentified smectic phase.

(a) SmA (160.2 °C)

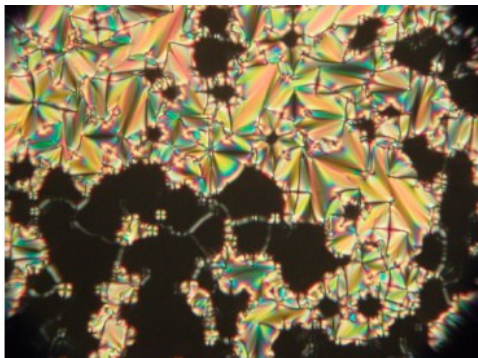

(b) SmC (150.5 °C)

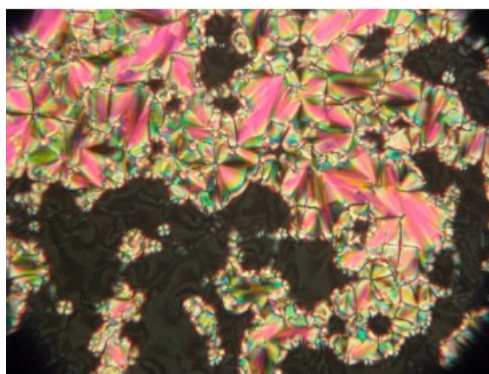

(c) SmX (141.6 °C)

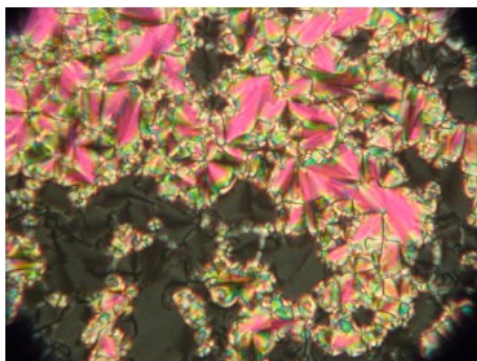

(d) Y (133.0 °C)

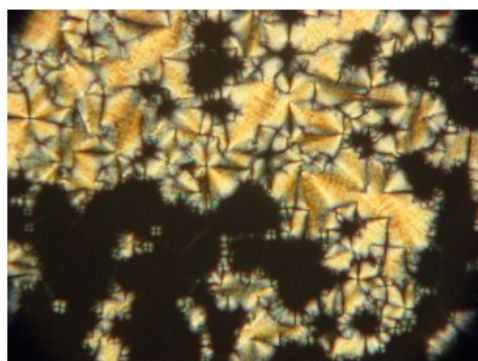

Fig. S1 Polarized optical textures of trimer **III**-(7,7) on a glass slide with a cover glass in the SmA, SmC, SmX and Y phases.

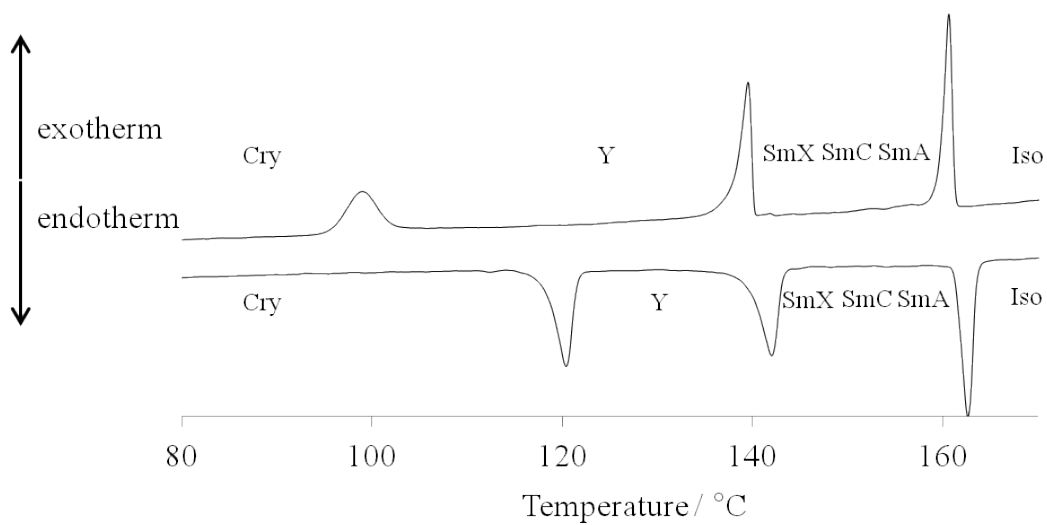

Fig. S2 DSC thermogram of trimer **III**-(7,7). The rate of cooling and heating was 5 °C min<sup>-1</sup>.
